# Supplementary material
Source: publisher figshare collection journal article supplement (https://karger.figshare.com/ndownloader/files/27339929)
Supplement: Supplementary file 1 [file 27339929]

**SUPPLEMENTAL MATERIAL**

**Table S1: Risk of MVM placental pathology in the smaller twin by discordance cut-off and SGA status of the smaller twin**

| **Discordance cut-off** | **SGA status of the smaller twin** | **N** | **Risk of ≥2 MVM lesions** | | |
| --- | --- | --- | --- | --- | --- |
|  |  |  | Rate [N (%)] | Crude RR  (95%-CI) | Adjusted RR  (95%-CI) a |
| **<10%** | **Non-SGA** | 497 | 8 (1.6) | Reference | Reference |
|  | **SGA** | 114 | 9 (7.9) | **4.90 (1.93-12.43)** | **6.31 (2.06-19.36)** |
| **≥10%** | **Non-SGA** | 288 | 14 (4.9) | **3.02 (1.28-7.11)** | **2.73 (1.15-6.47)** |
|  | **SGA** | 299 | 27 (9.0) | **5.61 (2.58-12.19)** | **6.56 (2.79-15.43)** |
| **≥15%** | **Non-SGA** | 136 | 5 (3.7) | 2.28 (0.76-6.87) | 1.89 (0.62-5.79) |
|  | **SGA** | 232 | 22 (9.5) | **5.89 (2.67-13.03)** | **6.53 (2.75-15.49)** |
| **≥20%** | **Non-SGA** | 60 | 3 (5.0) | 1.90 (0.33-11.01) | 0.97 (0.17-5.52) |
|  | **SGA** | 160 | 17 (10.6) | **6.60 (2.90-15.00)** | **6.83 (2.83-16.50)** |
| **≥25%** | **Non-SGA** | 20 | 3 (15.0) | **9.32 (2.67-32.50)** | **7.01 (2.04-24.10)** |
|  | **SGA** | 105 | 12 (11.4) | **7.10 (2.98-16.94)** | **6.25 (2.48-15.71)** |
| **≥30%** | **Non-SGA** | 3 | 2 (66.7) | **-** | **-** |
|  | **SGA** | 67 | 9 (13.4) | **8.34 (3.33-20.89)** | **7.43 (2.83-19.54)** |

CI, confidence interval; MVM, maternal vascular malperfusion; SGA, small for gestational age (birth weight below 10th percentile); RR, relative risk

Significant associations are emphasized in bold font.

a Values reflect the results of multivariable log binomial regression analysis to determine the association between discordance (using the corresponding cut-off) and MVM placental pathology. Models are adjusted for maternal age, hypertensive disorders of pregnancy (preeclampsia or gestational hypertension), gestational age at delivery, and neonatal sex, and are presented as adjusted RR (95%-CI).
